# Supplementary material
Source: publisher figshare collection journal article supplement (https://springernature.figshare.com/ndownloader/files/14014052)
Supplement: Supplementary file [file 14014052]

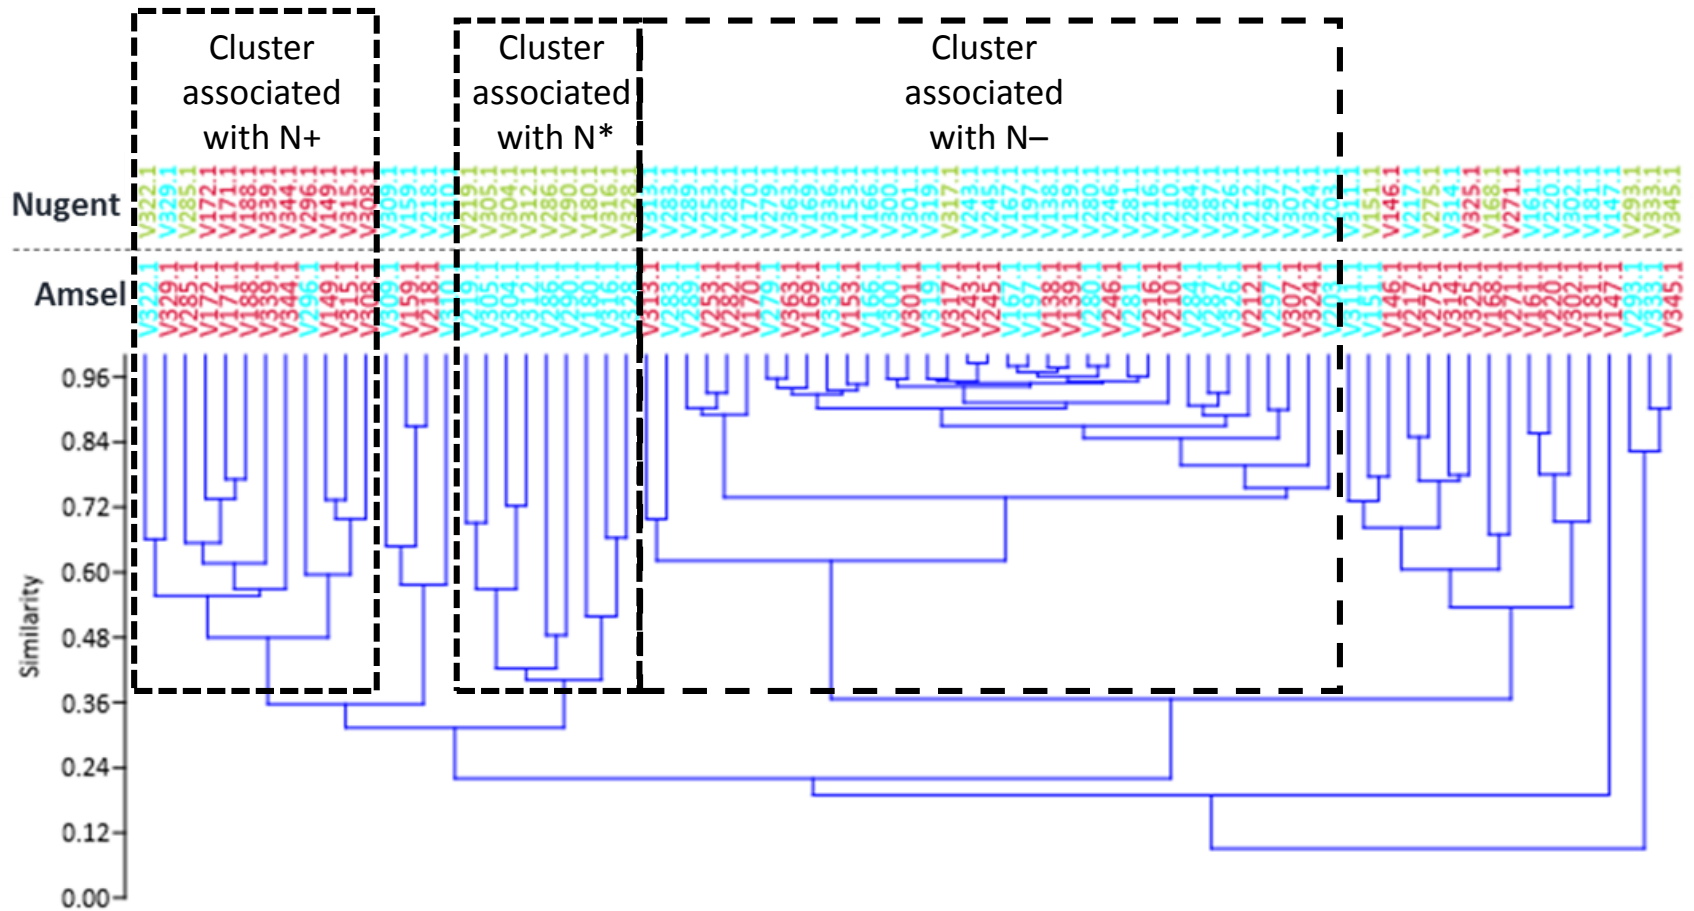

**Figure S5. Hierarchical clustering method with Bray-Curtis metric.** Most BV-positive women diagnosed with their Nugent scoring test (top row and red ID) clustered at the minimum distance level compared with women diagnosed by the Amsel criteria.
